# Supplementary material for: Improving the efficiency and stability of inverted perovskite solar cells with dopamine-copolymerized PEDOT:PSS as a hole extraction layer
Source: Royal Society of Chemistry journal article supplement (doi:10.1039/c7ta02670f), 2017-01-01
Supplement: c7ta02670f1.pdf [file c7ta02670f1.pdf]

**Electronic Supplementary Information**

**Improving the Efficiency and Stability of Inverted Perovskite Solar  
Cells with Dopamine-Copolymerized PEDOT: PSS as Hole  
Extraction Layer**

Ju Huang, <sup>\*a</sup> kai-xuan Wang,<sup>c</sup> Jing-Jing Chang,<sup>c</sup> Yan-yun Jiang,<sup>a</sup> Qi-shi Xiao,<sup>a</sup> Yuan Li<sup>\*b</sup>

<sup>a</sup>School of Chemistry and Chemical Engineering, Guangdong Pharmaceutical

University, Zhongshan, Guangdong, 528458, China

<sup>b</sup>School of Chemistry and Chemical Engineering, South China University of

Technology, Guangzhou, Guangdong, 510641, China

<sup>c</sup>State Key Laboratory of Wide Band Gap Semiconductor Technology, School of

Microelectronics, Xidian University, 2 South Taibai Road, Xi'an, 710071, China

Corresponding Author : Email: xianghuangj@163.com, celiy@scut.edu.cn

|    |                                                                                                            |    |
|----|------------------------------------------------------------------------------------------------------------|----|
| 16 | <b>1 Materials</b> .....                                                                                   | 3  |
| 17 | 2. Experiment sections .....                                                                               | 3  |
| 18 | 2.1 Preparation of DA-PEDOT: PSS .....                                                                     | 3  |
| 19 | 2.2 Characterization of techniques .....                                                                   | 4  |
| 20 | 2.3 Fabrication and Characterization of PSCs .....                                                         | 4  |
| 21 | Figure S1. The IR spectra of (a) PEDOT: PSS: PDA, (b) EDOT and (c) DA·HCl .....                            | 6  |
| 22 | Figure S2. UV-vis absorption spectra of PEDOT: PSS and DA-PEDOT: PSS aqueous                               |    |
| 23 | solutions .....                                                                                            | 7  |
| 24 | Figure S3. Transmittance spectra of PEDOT: PSS and DA-PEDOT: PSS on ITO substrates .....                   | 8  |
| 25 | <b>Figure S4.</b> $1/C^2$ -V curves of devices with PEDOT:PSS and DA-PEDOT:PSS as the HTLs. ....           | 9  |
| 26 | <b>Figure S5.</b> Contact angel of solutions of PEDOT:PSS and DA-PEDOT:PSS droplets on                     |    |
| 27 | glass .....                                                                                                | 10 |
| 28 | <b>Table S1.</b> Photovoltaic parameters of PSCs by applying PEDOT:PSS and DA-PEDOT: PSS                   |    |
| 29 | solutions with different concentration as HTLs under 100 mW/cm <sup>2</sup> air mass 1.5 Global (AM 1.5 G) |    |
| 30 | illumination .....                                                                                         | 11 |

## 32 **1 Materials**

33 3-Hydroxytyramine hydrochloride (DA), with a purity of 98%, from Energy Chemical  
34 Co. Ltd. (Shanghai, China), was kept in temperature of 0 °C. Polystyrene sulfonic acid  
35 (PSS, Mw=75000 Da, 30 wt.%) was brought from Alfa. 3, 4-ethylenedioxy thiophene  
36 (EDOT), preserved with low temperature of 0 °C, was purchased from Bayer AG.  
37 Ammonium persulphate ((NH<sub>4</sub>)<sub>2</sub>S<sub>2</sub>O<sub>8</sub>, APS) was obtained from Sigma and used as  
38 oxidant in this experiment. The concentration of 1.0% by weight of PEDOT: PSS  
39 (Baytron PVPAl 4083) was used for contrast. All other chemicals were of analytical  
40 grade. The water used in laboratory was deionized water.

## 41 **2. Experiment sections**

### 42 **2.1 Preparation of DA-PEDOT: PSS**

43 The mixed solution containing PSS (20 g, with a mass fraction of 30%) and EDOT  
44 monomer (1 g) was adjusted to pH=2. After stirring for 30min, oxidizing agent APS  
45 (2.17 g) and DA monomer (0.2 g) were simultaneously added. Subsequently, the color  
46 changed from light yellow to dark blue after 24h stirring at room temperature. Thus,  
47 the rough product **DA-PEDOT: PSS** was obtained. The rough product was  
48 dialyzed by a dialysis membrane (Special products laboratory, USA, MWCO of  
49 1000 Da) to remove inorganic salt and the pure product (PEDOT+PDA): PSS  
50 was available.

## 51 2.2 Characterization of Techniques

52 FTIR spectra were performed using the KBr pellets in the 4000-400  $\text{cm}^{-1}$  region by  
53 Auto system XL/I-series/Spectrum 2000 spectrometry (Thermo Nicolet Co., Madison,  
54 WI, USA). Element contents of C, H and S were rationed by Vario EL cube  
55 (Elementar, Germany) with about 5.0 mg packed in aluminized paper. UV-vis  
56 absorption and transmittance spectra were measured by Shimadzu UV-3600  
57 spectrophotometer (Japan) and ShimadzuUV-2600 spectrophotometer (Japan),  
58 respectively. The films thicknesses were tested by a step profiler (Dektak150, Veeco,  
59 USA). Dynamic light scattering (DLS) experiments were performed on a Zeta PALS  
60 instrument (Brookhaver, America). Cyclic voltammetry (CV) test was conducted with  
61 a film on glassy carbon electrode against Ag/AgCl (3M KCl solution) reference  
62 electrode at scanning rate 100mV/s. The conductivity and sheet resistance of PEDOT:  
63 PSS and **(PEDOT+PDA): PSS** films were measured with a KDY-1four point  
64 probesresistivity/resistance measurement system. The films were prepared by  
65 dropping the sample on glass and air drying at room temperature. UPS and XPS  
66 measurements were conducted on a Thermo Scientific ESCALAB 250Xi with a He (I)  
67 UV source (21.22 eV) in ultrahigh vacuum. For testing UPS and XPS, the samples  
68 were spin-coated onto ITO glass and kept in an oven at 110 °C for 15 min before the  
69 measurement, and all of the experimental processes were conducted in ultrahigh  
70 vacuum environment. Atomic force microscopy (AFM) images were observed by a  
71 Park XE-100in tapping mode. Surface wettability was measured using a static contact  
72 angle instrument (Powereach JC2000 C1, Shanghai, China).

## 73 2.3 Fabrication and Characterization of PSCs

74 The configurations of PSCs were ITO/HTLs/ $\text{MAPbI}_{3-x}\text{Cl}_x$ /PC<sub>61</sub>BM/BCP/Ag. ITO-  
75 coated glass substrates were cleaned via a series of ultrasonication in detergent,  
76 acetone, DI water, isopropyl alcohol and followed by UV-ozone plasma treatment.  
77 **(PEDOT+PDA): PSS** layer was spin-coated onto the pre-patterned ITO glass

78 substrate and annealed using a hot plate at 140°C for 15 min to remove residual  
79 solvents. PEDOT: PSS (Baytron PVPAl 4083) based device was also fabricated as  
80 comparison with the same method. The substrates with (PEDOT+PDA): PSS or  
81 PEDOT:PSS were then transferred into a glove box filled with highly pure N<sub>2</sub>. Then  
82 MAPbI<sub>3-x</sub>Cl<sub>x</sub> precursor solution (1.26 M PbI<sub>2</sub>, 0.14M PbCl<sub>2</sub> and 1.35 M MAI in  
83 cosolvent of DMSO: GBL at Vol ratio of 3:7) was spin-coated to form a perovskite  
84 layer of about 280 nm on the modified ITO substrate. After annealing at 100°C for 20  
85 min, the PCBM layer (~55 nm) was deposited by spin coating onto the surface of  
86 perovskite layer. After that, 0.5 mg/mL BCP solution was spin coated onto  
87 PCBM layer. The devices were completed by thermal deposition a layer of 100 nm  
88 A gas cathode in a vacuum of <1×10<sup>-6</sup> Torr. The devices area was 0.07cm<sup>2</sup> defined  
89 by shadow mask.

90 The photovoltaic performance of the PSCs was tested in air with a computer-  
91 programmed Keithley 2400 source/meter and a Newport's Oriel class solar simulator,  
92 which simulated the AM1.5 sunlight with energy density of 100 mW/cm<sup>2</sup> and was  
93 certified to the JIS C 8912 standard. IPCEs of PSCs were measured with a 300W  
94 Xenon Lamp (Oriel 6258) and a Cornerstone 260 Oriel 74125 monochromator. The  
95 photovoltaic stability of PSCs was investigated by storing the unencapsulated devices  
96 in N<sub>2</sub>inert atmosphere for 28 days. The UV-visible absorption spectra were  
97 measured on a Perkin-Elmer Lambda 950 spectrophotometer.  
98 Photoluminescence spectra were collected on an Edinburgh Instruments  
99 FLS920 spectrofluorometer, the excitation wavelength was 630 nm. Scanning  
100 electron microscopy (SEM) images were obtained on a JSM-7800F SEM. Thin  
101 film X-ray diffraction (XRD) measurements were conducted on a Bruker D8  
102 Advance XRD instrument.

103

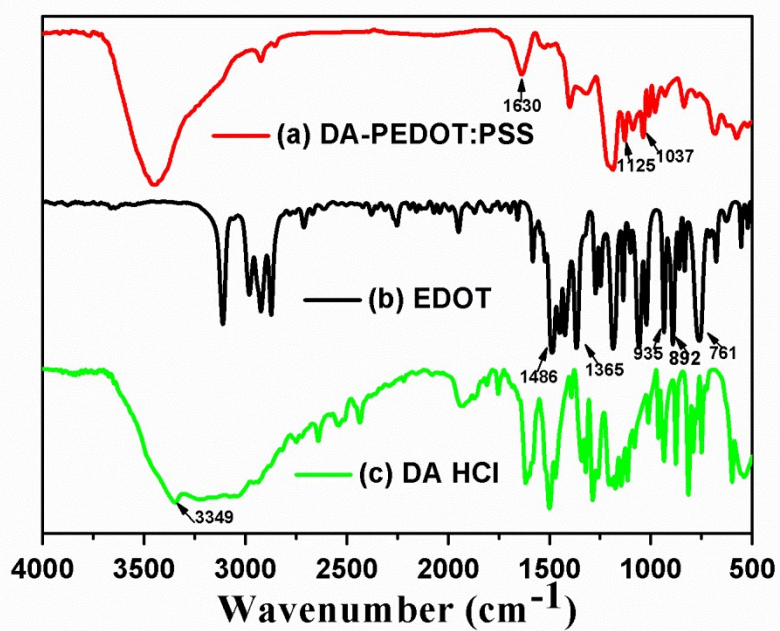

104

105 **Figure S1.** The IR spectra of (a) PEDOT: PSS: PDA, (b) EDOT and (c) DA·HCl

106

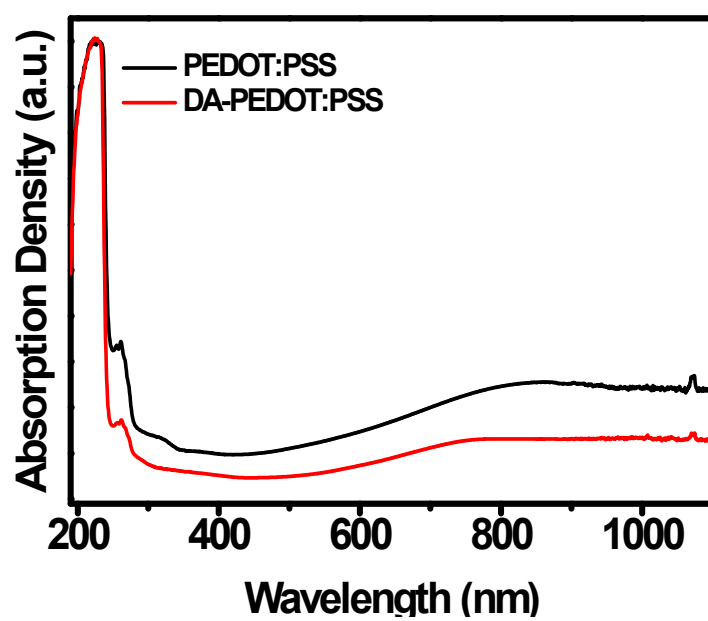

108

109

**Figure S2.** UV-vis absorption spectra of PEDOT: PSS and DA-PEDOT: PSS aqueous solutions

110

111

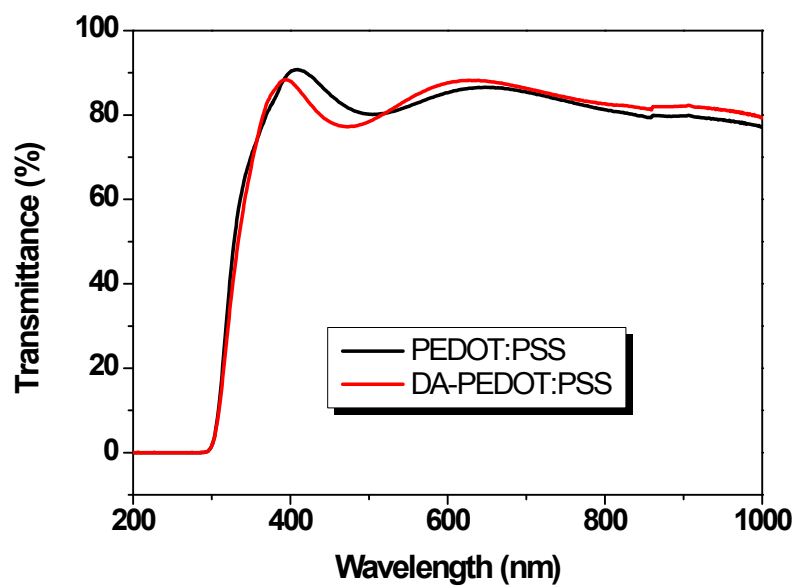

112

113 **Figure S3.** Transmittance spectra of PEDOT: PSS and DA-PEDOT: PSS on ITO substrates.

114



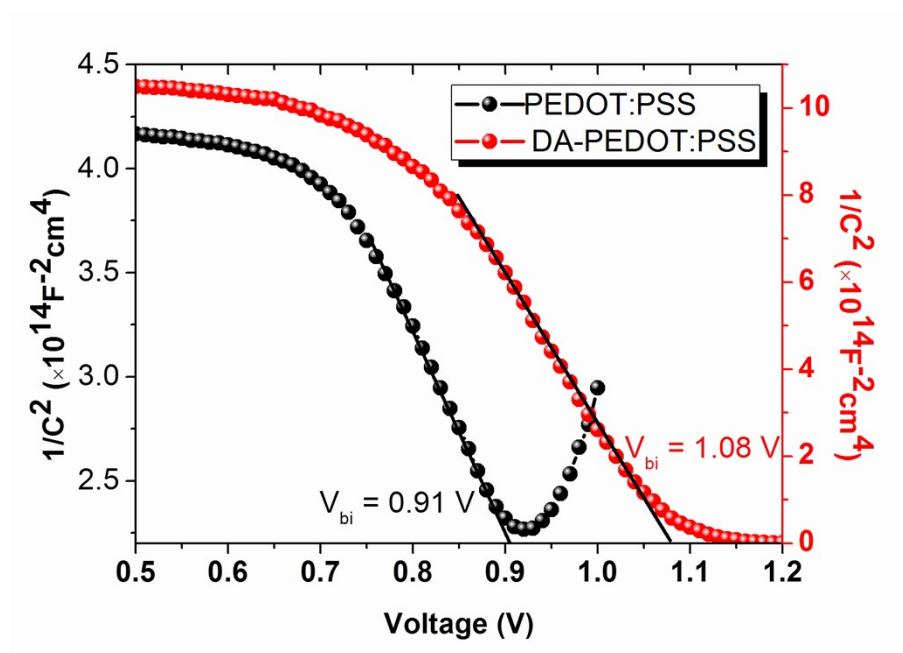

115

116

**Figure S4.**  $1/C^2$ -V curves of devices with PEDOT:PSS and DA-PEDOT:PSS as the HTLs.

117

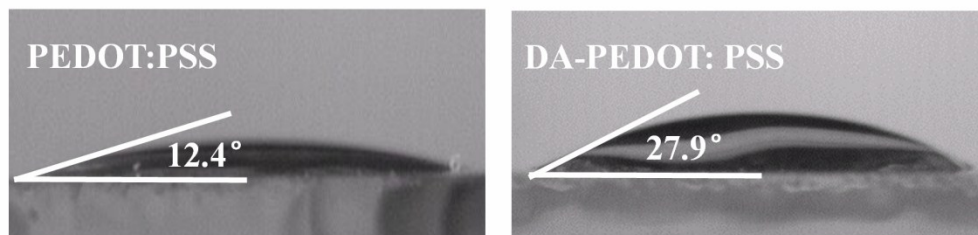

118  
119 **Figure S5.** Contact angel of solutions of PEDOT:PSS and DA-PEDOT:PSS droplets on glass.  
120

**Table S1.** Photovoltaic parameters of PSCs by applying PEDOT: PSS and DA-PEDOT: PSS solutions with different concentration as HELs.

|                             | J <sub>sc</sub> (mA/cm <sup>2</sup> ) | V <sub>oc</sub> (V) | FF          | PCE (%)       |
|-----------------------------|---------------------------------------|---------------------|-------------|---------------|
| PEDOT:PSS                   | 18.74 (20.63)                         | 1.00 (0.97)         | 0.71 (0.98) | 13.31 (15.21) |
| DA-PEDOT: PSS<br>(1.2 wt%)  | 14.11                                 | 0.96                | 0.38        | 5.15          |
| DA-PEDOT: PSS<br>(0.6 wt%)  | 19.47                                 | 0.95                | 0.62        | 11.47         |
| DA-PEDOT: PSS<br>(0.3 wt%)  | 19.79 (20.10)                         | 1.04 (1.09)         | 0.66 (0.70) | 13.58 (14.77) |
| DA-PEDOT: PSS<br>(0.15 wt%) | 20.53 (20.10)                         | 1.06 (1.05)         | 0.70 (0.76) | 15.23 (16.65) |

The performance in bracket were obtained from samples filtered with 0.22 um filter film before spin- coating.
